# Supplementary material
Source: PubMed Central journal article supplement (PMC3375406)
Supplement: hdy201214x2.pdf [file hdy201214x2.pdf]

**SUPPLEMENTARY DATA SET  
FOR MANUSCRIPT**

**CD36-DEFICIENT CONGENIC STRAINS SHOW IMPROVED GLUCOSE  
TOLERANCE AND DISTINCT SHIFTS IN METABOLIC AND TRANSCRIPTOMIC  
PROFILES**

**Lucie Šedová<sup>1</sup>, František Liška<sup>1</sup>, Drahomíra Křenová<sup>1</sup>, Ludmila Kazdová<sup>3</sup>, Johanne  
Tremblay<sup>2</sup>, Michaela Krupková<sup>1</sup>, Gilles Corbeil<sup>2</sup>, Pavel Hamet<sup>2</sup>, Vladimír Křen<sup>1</sup>,  
Ondřej Šeda<sup>1,2</sup>**

<sup>1</sup>Institute of Biology and Medical Genetics, the First Faculty of Medicine, Charles University  
and the General Teaching Hospital, Prague, Czech Republic

<sup>2</sup>Centre de recherche, Centre hospitalier de l'Université de Montréal (CRCHUM) –  
Technopole Angus, Montreal, Quebec, Canada

<sup>3</sup>Department of Metabolism and Diabetes, Institute for Clinical and Experimental Medicine,  
Prague, Czech Republic

**Supplementary Data Set. List of significantly differentially expressed transcripts between PD and PD.SHR4a (FDR = 0.1). Negative fold change indicates decreased expression in PD.SHR4a compared to PD and vice versa.**

| <b>Fold Change</b> | <b>ID</b>    | <b>Gene Symbol</b>   | <b>Entrez Gene Name</b>                                                                                                           |
|--------------------|--------------|----------------------|-----------------------------------------------------------------------------------------------------------------------------------|
| -13.525            | NM_024362    | <i>ARNTL</i>         | aryl hydrocarbon receptor nuclear translocator-like                                                                               |
| -11.695            | NM_031561    | <i>CD36</i>          | CD36 fatty acid translocase                                                                                                       |
| -9.976             | NM_022392    | <i>INSIG1</i>        | insulin induced gene 1                                                                                                            |
| -9.616             | NM_001024272 | <i>Phf11</i>         | PHD finger protein 11                                                                                                             |
| -7.029             | NM_020072    | <i>ACPP</i>          | acid phosphatase, prostate                                                                                                        |
| -6.949             | NM_001013175 | <i>Apol3</i>         | apolipoprotein L, 3<br>steroid-5-alpha-reductase, alpha polypeptide 1 (3-oxo-5 alpha-steroid delta 4-dehydrogenase alpha 1)       |
| -6.679             | NM_017070    | <i>SRD5A1</i>        | solute carrier family 34 (sodium phosphate), member 2                                                                             |
| -6.067             | NM_053380    | <i>SLC34A2</i>       | leukotriene C4 synthase                                                                                                           |
| -5.679             | NM_053639    | <i>LTC4S</i>         |                                                                                                                                   |
| -5.295             | NM_001003706 | <i>1100001G20Rik</i> | RIKEN cDNA 1100001G20 gene                                                                                                        |
| -4.733             | NM_053727    | <i>NFIL3</i>         | nuclear factor, interleukin 3 regulated proteasome (prosome, macropain) subunit, beta type, 8 (large multifunctional peptidase 7) |
| -3.114             | NM_080767    | <i>PSMB8</i>         |                                                                                                                                   |
| -2.851             | NM_001009283 | <i>C19orf46</i>      | chromosome 19 open reading frame 46                                                                                               |
| -2.729             | NM_053570    | <i>CXADR</i>         | coxsackie virus and adenovirus receptor capping protein (actin filament), gelsolin-like                                           |
| -2.654             | NM_001013086 | <i>CAPG</i>          | sigma non-opioid intracellular receptor 1                                                                                         |
| -2.577             | NM_030996    | <i>SIGMARI</i>       | hepcidin antimicrobial peptide                                                                                                    |
| -2.543             | NM_053469    | <i>HAMP</i>          | caspace 1, apoptosis-related cysteine peptidase (interleukin 1, beta, convertase)                                                 |
| -2.536             | NM_012762    | <i>CASP1</i>         |                                                                                                                                   |
| -2.477             | NM_176074    | <i>C6</i>            | complement component 6                                                                                                            |
| -2.316             | NM_001014023 | <i>TRIM5</i>         | tripartite motif-containing 5                                                                                                     |
| -2.310             | NM_012515    | <i>TSPO</i>          | translocator protein (18kDa)                                                                                                      |
| -2.301             | NM_012907    | <i>APOBEC1</i>       | apolipoprotein B mRNA editing enzyme, catalytic polypeptide 1                                                                     |
| -2.231             | NM_198134    | <i>BST2</i>          | bone marrow stromal cell antigen 2                                                                                                |
| -2.153             | NM_001008374 | <i>PGRMC2</i>        | progesterone receptor membrane component 2                                                                                        |
| -2.130             | NM_198755    | <i>VWA5A</i>         | von Willebrand factor A domain containing 5A                                                                                      |

|        |              |                      |                                                                                                 |
|--------|--------------|----------------------|-------------------------------------------------------------------------------------------------|
| -2.010 | NM_001001504 | <i>GTF2IRD1</i>      | GTF2I repeat domain containing 1                                                                |
| -1.996 | NM_012823    | <i>ANXA3</i>         | annexin A3                                                                                      |
| -1.968 | NM_001012075 | <i>TSPYL4</i>        | TSPY-like 4                                                                                     |
| -1.905 | NM_172322    | <i>PYCARD</i>        | PYD and CARD domain containing protein tyrosine phosphatase, non-receptor type 2                |
| -1.883 | NM_053990    | <i>PTPN2</i>         | embigin                                                                                         |
| -1.852 | NM_053719    | <i>EMB</i>           | presenilin 2 (Alzheimer disease 4)                                                              |
| -1.828 | NM_031087    | <i>PSEN2</i>         | notch 2                                                                                         |
| -1.826 | NM_024358    | <i>NOTCH2</i>        | clock homolog (mouse)                                                                           |
| -1.816 | NM_021856    | <i>CLOCK</i>         |                                                                                                 |
| -1.781 | NM_001011999 | <i>A730098P11Rik</i> | RIKEN cDNA A730098P11 gene T-cell immunoglobulin and mucin domain containing 2                  |
| -1.739 | NM_001013855 | <i>Timd2</i>         | CD200 receptor 1                                                                                |
| -1.737 | NM_023953    | <i>CD200R1</i>       | adenosine deaminase                                                                             |
| -1.678 | NM_130399    | <i>ADA</i>           | CD2-associated protein                                                                          |
| -1.677 | NM_181475    | <i>CD2AP</i>         | syntaxin 2                                                                                      |
| -1.673 | NM_012748    | <i>STX2</i>          | protein tyrosine phosphatase, receptor type, S                                                  |
| -1.651 | NM_019140    | <i>PTPRS</i>         |                                                                                                 |
| -1.638 | NM_001004242 | <i>ARHGAP8</i>       | Rho GTPase activating protein 8 SMT3 suppressor of mif two 3 homolog 3 ( <i>S. cerevisiae</i> ) |
| -1.567 | NM_001024295 | <i>SUMO3</i>         | mitogen-activated protein kinase 6                                                              |
| -1.561 | NM_031622    | <i>MAPK6</i>         | creatine kinase, brain                                                                          |
| -1.534 | NM_012529    | <i>CKB</i>           | complement component 9                                                                          |
| -1.513 | NM_057146    | <i>C9</i>            | attractin                                                                                       |
| -1.494 | NM_031351    | <i>ATRN</i>          | myosin, heavy chain 9, non-muscle non-metastatic cells 2, protein (NM23B)                       |
| -1.484 | NM_013194    | <i>MYH9</i>          | expressed in complement component 1, s subcomponent                                             |
| -1.476 | NM_031833    | <i>NME2</i>          | parkinson protein 2, E3 ubiquitin protein ligase (parkin)                                       |
| -1.472 | NM_138900    | <i>C1S</i>           | complement factor H                                                                             |
| -1.470 | NM_020093    | <i>PARK2</i>         | GM2 ganglioside activator                                                                       |
| -1.465 | NM_130409    | <i>CFH</i>           | SAFB-like, transcription modulator                                                              |
| -1.462 | NM_172335    | <i>GM2A</i>          | calmodulin 1                                                                                    |
| -1.462 | BC092633     | <i>SLTM</i>          |                                                                                                 |
| -1.455 | NM_031969    | <i>Calm1</i>         |                                                                                                 |
| -1.441 | NM_001004251 | <i>C2orf47</i>       | chromosome 2 open reading frame 47                                                              |
| -1.436 | NM_001024998 | <i>TXNDC15</i>       | thioredoxin domain containing 15                                                                |
| -1.435 | NM_001007646 | <i>FKBP9</i>         | FK506 binding protein 9, 63 kDa                                                                 |
| -1.424 | NM_138917    | <i>FBXO6</i>         | F-box protein 6                                                                                 |
| -1.424 | XM_001075782 |                      |                                                                                                 |

|        |              |                  |                                                                                     |
|--------|--------------|------------------|-------------------------------------------------------------------------------------|
| -1.412 | NM_138549    | <i>TECR</i>      | trans-2,3-enoyl-CoA reductase                                                       |
| -1.410 | NM_212509    | <i>NFKBIL1</i>   | nuclear factor of kappa light polypeptide gene enhancer in B-cells inhibitor-like 1 |
| -1.396 | NM_001013118 | <i>ABI3</i>      | ABI family, member 3                                                                |
| -1.394 | NM_012578    | <i>H1F0</i>      | H1 histone family, member 0                                                         |
| -1.371 | NM_012516    | <i>C4BPA</i>     | complement component 4 binding protein, alpha                                       |
| -1.356 | NM_133307    | <i>PRKCD</i>     | protein kinase C, delta                                                             |
| -1.354 | NM_001009478 | <i>SAA4</i>      | serum amyloid A4, constitutive                                                      |
| -1.342 | NM_001013884 | <i>UIMC1</i>     | ubiquitin interaction motif containing 1                                            |
| -1.290 | NM_001008933 | <i>VNIR1</i>     | vomeronal 1 receptor 1                                                              |
| -1.289 | NM_024162    | <i>FABP3</i>     | fatty acid binding protein 3, muscle and heart (mammary-derived growth inhibitor)   |
| -1.289 | NM_212517    | <i>NDUFA11</i>   | NADH dehydrogenase (ubiquinone) 1 alpha subcomplex, 11, 14.7kDa                     |
| -1.282 | NM_145098    | <i>NRP1</i>      | neuropilin 1                                                                        |
| -1.281 | NM_012532    | <i>CP</i>        | ceruloplasmin (ferroxidase)                                                         |
| -1.269 | NM_181379    | <i>PPP2R5B</i>   | protein phosphatase 2, regulatory subunit B', beta                                  |
| -1.268 | NM_133396    | <i>TESK2</i>     | testis-specific kinase 2                                                            |
| -1.265 | AF315467     | <i>ANUBL1</i>    | AN1, ubiquitin-like, homolog (Xenopus laevis)                                       |
| -1.245 | NM_176080    | <i>BC021785</i>  | cDNA sequence BC021785                                                              |
| -1.238 | NM_019296    | <i>CDK1</i>      | cyclin-dependent kinase 1                                                           |
| -1.233 | NM_139105    | <i>RNH1</i>      | ribonuclease/angiogenin inhibitor 1                                                 |
| -1.219 | NM_021774    | <i>FHIT</i>      | fragile histidine triad gene                                                        |
| -1.211 | NM_212544    | <i>PRR3</i>      | proline rich 3                                                                      |
| -1.209 | NM_212466    | <i>CFB</i>       | complement factor B                                                                 |
| -1.186 | NM_017170    | <i>APCS</i>      | amyloid P component, serum                                                          |
| -1.170 | NM_012639    | <i>RAF1</i>      | v-raf-1 murine leukemia viral oncogene homolog 1                                    |
| -1.156 | NM_053671    | <i>TMF1</i>      | TATA element modulatory factor 1                                                    |
| -1.152 | NM_052803    | <i>ATP7A</i>     | ATPase, Cu <sup>++</sup> transporting, alpha polypeptide                            |
| -1.089 | NM_016994    | <i>C3</i>        | complement component 3                                                              |
| -1.076 | NM_153627    | <i>PROP1</i>     | PROP paired-like homeobox 1                                                         |
| -1.068 | NM_001000533 | <i>Olfir1406</i> | olfactory receptor 1406                                                             |
| 1.143  | NM_022279    | <i>MRE11A</i>    | MRE11 meiotic recombination 11 homolog A (S. cerevisiae)                            |
| 1.144  | NM_031595    | <i>PSMC3</i>     | proteasome (prosome, macropain) 26S subunit, ATPase, 3                              |
| 1.172  | NM_022684    | <i>BID</i>       | BH3 interacting domain death agonist                                                |
| 1.186  | NM_031589    | <i>SLC37A4</i>   | solute carrier family 37 (glucose-6-phosphate transporter), member 4                |

|       |              |                 |                                                                                               |
|-------|--------------|-----------------|-----------------------------------------------------------------------------------------------|
| 1.195 | NM_133418    | <i>SLC25A10</i> | solute carrier family 25 (mitochondrial carrier; dicarboxylate transporter), member 10        |
| 1.201 | NM_053768    | <i>UOX</i>      | urate oxidase, pseudogene                                                                     |
| 1.204 | NM_001008368 | <i>SIRT2</i>    | sirtuin 2                                                                                     |
| 1.210 | AF540911     | <i>JAK1</i>     | Janus kinase 1                                                                                |
| 1.235 | NM_012973    | <i>KCNE1</i>    | potassium voltage-gated channel, Isk-related family, member 1                                 |
| 1.241 | NM_022301    | <i>PI4KA</i>    | phosphatidylinositol 4-kinase, catalytic, alpha                                               |
| 1.256 | NM_001008766 | <i>CIAO1</i>    | cytosolic iron-sulfur protein assembly 1                                                      |
| 1.265 | NM_001000808 | <i>Olfir912</i> | olfactory receptor 912                                                                        |
| 1.272 | NM_170788    | <i>ERC1</i>     | ELKS/RAB6-interacting/CAST family member 1                                                    |
| 1.297 | NM_001009385 | <i>Apon</i>     | apolipoprotein N                                                                              |
| 1.305 | NM_001009639 | <i>TPPP3</i>    | tubulin polymerization-promoting protein family member 3                                      |
| 1.314 | NM_153308    | <i>GRINA</i>    | glutamate receptor, ionotropic, N-methyl D-aspartate-associated protein 1 (glutamate binding) |
| 1.316 | NM_001004247 | <i>UBL7</i>     | ubiquitin-like 7 (bone marrow stromal cell-derived)                                           |
| 1.319 | NM_022869    | <i>NOLC1</i>    | nucleolar and coiled-body phosphoprotein 1                                                    |
| 1.321 | NM_199099    | <i>IMPDH2</i>   | IMP (inosine 5'-monophosphate) dehydrogenase 2                                                |
| 1.327 | XM_001070418 |                 |                                                                                               |
| 1.337 | NM_001012175 | <i>ZFAND3</i>   | zinc finger, AN1-type domain 3                                                                |
| 1.359 | NM_001008360 | <i>C16orf5</i>  | chromosome 16 open reading frame 5                                                            |
| 1.362 | NM_017358    | <i>CDON</i>     | Cdon homolog (mouse)                                                                          |
| 1.362 | NM_001009622 | <i>SAR1B</i>    | SAR1 homolog B ( <i>S. cerevisiae</i> )                                                       |
| 1.378 | NM_001014158 | <i>ZNF761</i>   | zinc finger protein 761                                                                       |
| 1.404 | NM_181823    | <i>RHOT2</i>    | ras homolog gene family, member T2                                                            |
| 1.408 | NM_031543    | <i>CYP2E1</i>   | cytochrome P450, family 2, subfamily E, polypeptide 1                                         |
| 1.426 | NM_001004207 | <i>DHPS</i>     | deoxyhypusine synthase                                                                        |

|       |              |                |                                                       |
|-------|--------------|----------------|-------------------------------------------------------|
| 1.428 | NM_080477    | <i>PFKFB2</i>  | 6-phosphofructo-2-kinase/fructose-2,6-biphosphatase 2 |
| 1.444 | XM_226159    |                |                                                       |
| 1.448 | NM_012891    | <i>ACADVL</i>  | acyl-CoA dehydrogenase, very long chain               |
| 1.454 | NM_017340    | <i>ACOX1</i>   | acyl-CoA oxidase 1, palmitoyl                         |
| 1.467 | NM_001012013 | <i>ACBD4</i>   | acyl-CoA binding domain containing 4                  |
| 1.478 | NM_019130    | <i>INS</i>     | insulin                                               |
| 1.485 | NM_001013124 | <i>UNG</i>     | uracil-DNA glycosylase                                |
| 1.492 | NM_001014146 | <i>C7orf10</i> | chromosome 7 open reading frame 10                    |
| 1.503 | NM_001011941 | <i>CDC37L1</i> | cell division cycle 37 homolog (S. cerevisiae)-like 1 |
| 1.519 | NM_001000286 | <i>Olr447</i>  | olfactory receptor 447                                |
| 1.545 | NM_031769    | <i>PDXK</i>    | pyridoxal (pyridoxine, vitamin B6) kinase             |
| 1.576 | NM_001014089 | <i>TBCEL</i>   | tubulin folding cofactor E-like                       |

|       |              |                |                                                                                                                                                                   |
|-------|--------------|----------------|-------------------------------------------------------------------------------------------------------------------------------------------------------------------|
| 1.580 | NM_001009673 | <i>FASTKD2</i> | FAST kinase domains 2                                                                                                                                             |
| 1.587 | NM_134353    | <i>PABPC1</i>  | poly(A) binding protein, cytoplasmic 1                                                                                                                            |
| 1.594 | NM_031614    | <i>TXNRD1</i>  | thioredoxin reductase 1                                                                                                                                           |
| 1.615 | NM_134330    | <i>Keg1</i>    | kidney expressed gene 1<br>phosphoribosylglycinamide<br>formyltransferase,<br>phosphoribosylglycinamide synthetase,<br>phosphoribosylaminoimidazole<br>synthetase |
| 1.619 | BC087644     | <i>GART</i>    | synthetase                                                                                                                                                        |
| 1.631 | XM_001053329 | <i>TDRKH</i>   | tudor and KH domain containing                                                                                                                                    |
| 1.633 | NM_139108    | <i>COMMD5</i>  | COMM domain containing 5                                                                                                                                          |
| 1.635 | NM_053904    | <i>OPLAH</i>   | 5-oxoprolinase (ATP-hydrolysing)                                                                                                                                  |
| 1.649 | NM_001001515 | <i>LMO7</i>    | LIM domain 7                                                                                                                                                      |
| 1.696 | NM_138840    | <i>TGOLN2</i>  | trans-golgi network protein 2                                                                                                                                     |
| 1.698 | NM_130747    | <i>ACOT12</i>  | acyl-CoA thioesterase 12                                                                                                                                          |
| 1.720 | NM_020540    | <i>Gstm3</i>   | glutathione S-transferase, mu 3                                                                                                                                   |
| 1.725 | NM_001035001 | <i>TMEM69</i>  | transmembrane protein 69                                                                                                                                          |
| 1.759 | NM_012959    | <i>GFRA1</i>   | GDNF family receptor alpha 1                                                                                                                                      |

|       |              |                |                                                                                                   |
|-------|--------------|----------------|---------------------------------------------------------------------------------------------------|
| 1.773 | NM_012947    | <i>EEF2K</i>   | eukaryotic elongation factor-2 kinase<br>degenerative spermatocyte homolog 1,                     |
| 1.782 | NM_053323    | <i>DEGS1</i>   | lipid desaturase (Drosophila)                                                                     |
| 1.844 | NM_001014020 | <i>TARSL2</i>  | threonyl-tRNA synthetase-like 2<br>dehydrogenase/reductase (SDR family)                           |
| 1.845 | NM_153315    | <i>DHRS4</i>   | member 4<br>steroid sulfatase (microsomal), isozyme                                               |
| 1.953 | NM_012661    | <i>STS</i>     | S                                                                                                 |
| 1.956 | NM_031553    | <i>NFYB</i>    | nuclear transcription factor Y, beta<br>matrix metalloproteinase 12                               |
| 1.989 | NM_053963    | <i>MMP12</i>   | (macrophage elastase)                                                                             |
| 1.992 | NM_001013190 | <i>RAD23A</i>  | RAD23 homolog A ( <i>S. cerevisiae</i> )<br>patatin-like phospholipase domain                     |
| 2.052 | XM_578102    | <i>PNPLA7</i>  | containing 7<br>homocysteine-inducible, endoplasmic<br>reticulum stress-inducible, ubiquitin-like |
| 2.061 | NM_053523    | <i>HERPUD1</i> | domain member 1                                                                                   |
| 2.266 | NM_001024292 | <i>C9orf95</i> | chromosome 9 open reading frame 95                                                                |



|        |              |                    |                                            |
|--------|--------------|--------------------|--------------------------------------------|
|        |              |                    | ATP-binding cassette, sub-family D         |
| 2.270  | NM_033352    | <i>ABCD2</i>       | (ALD), member 2                            |
|        |              |                    | histo-blood group ABO system               |
| 2.442  | AY228143     | <i>Abo2</i>        | transferase 2                              |
|        |              |                    | inositol 1,4,5-triphosphate receptor, type |
| 2.444  | NM_001007235 | <i>ITPR1</i>       | 1                                          |
|        |              |                    | <i>Rattus norvegicus</i> transmembrane     |
| 2.464  | ---          | <i>Tmem8</i>       | protein 48                                 |
| 2.596  | NM_133586    | <i>Ces2b/Ces2c</i> | carboxylesterase 2C                        |
|        |              |                    | ATP-binding cassette, sub-family B         |
| 2.618  | NM_133401    | <i>ABCB1</i>       | (MDR/TAP), member 1                        |
| 2.797  | NM_031317    | <i>PDGFC</i>       | platelet derived growth factor C           |
|        |              |                    | cytochrome P450, family 2, subfamily J,    |
| 3.566  | NM_023025    | <i>CYP2J2</i>      | polypeptide 2                              |
|        |              |                    | glucosaminyl (N-acetyl) transferase 2, I-  |
| 4.007  | NM_001001511 | <i>GCNT2</i>       | branching enzyme (I blood group)           |
|        |              |                    | aldehyde dehydrogenase 1 family,           |
| 4.568  | NM_022407    | <i>ALDH1A1</i>     | member A1                                  |
| 4.595  | NM_031678    | <i>PER2</i>        | period homolog 2 ( <i>Drosophila</i> )     |
| 4.789  | NM_031576    | <i>POR</i>         | P450 (cytochrome) oxidoreductase           |
|        |              |                    | nuclear receptor subfamily 1, group I,     |
| 5.735  | NM_022941    | <i>NR1I3</i>       | member 3                                   |
| 6.463  | NM_023978    | <i>PER3</i>        | period homolog 3 ( <i>Drosophila</i> )     |
|        |              |                    | insulin-like growth factor binding         |
| 6.530  | NM_013122    | <i>IGFBP2</i>      | protein 2, 36kDa                           |
|        |              |                    | ATP-binding cassette, sub-family G         |
| 11.190 | NM_053754    | <i>ABCG5</i>       | (WHITE), member 5                          |

|        |           |             |                                                   |
|--------|-----------|-------------|---------------------------------------------------|
| 11.499 | NM_022635 | <i>NAT8</i> | N-acetyltransferase 8 (GCN5-related,<br>putative) |
| 17.727 | NM_012551 | <i>EGR1</i> | early growth response 1                           |
